# Supplementary material for: Diagnostic Value of a Protocolized In-Depth Evaluation of Pediatric Bone Marrow Failure: A Multi-Center Prospective Cohort Study
Source: PubMed Central journal article supplement (PMC9094492; doi:10.3389/fimmu.2022.883826), 2022-04-27
Supplement: DataSheet_1.pdf [file DataSheet_1.pdf]

## Exome

## Gene panel Bone Marrow Failure (172 genes)

version 2, 09-12-2019

| HGNC approved<br>gene symbol | transcript     | median<br>depth | % covered<br>>10x | % covered<br>>20x | % covered<br>>30x | % covered<br>>50x |
|------------------------------|----------------|-----------------|-------------------|-------------------|-------------------|-------------------|
| <i>ABCB6</i>                 | NM_005689.4    | 111.00          | 100.00            | 99.99             | 99.59             | 95.88             |
| <i>ABCB7</i>                 | NM_001271696.3 | 91.00           | 100.00            | 99.92             | 99.59             | 97.93             |
| <i>ABL1</i>                  | NM_005157.6    | 102.00          | 99.77             | 98.16             | 97.49             | 96.43             |
| <i>ACTB</i>                  | NM_001101.5    | 154.00          | 100.00            | 100.00            | 99.80             | 99.50             |
| <i>ACTN1</i>                 | NM_001130004.1 | 81.00           | 99.86             | 99.11             | 97.26             | 90.24             |
| <i>ALAS2</i>                 | NM_000032.5    | 71.00           | 99.96             | 98.57             | 93.16             | 76.45             |
| <i>ANKRD26</i>               | NM_014915.2    | 104.00          | 97.43             | 93.90             | 89.45             | 81.40             |
| <i>AP3B1</i>                 | NM_003664.4    | 99.00           | 98.98             | 97.16             | 95.65             | 90.58             |
| <i>ASXL1</i>                 | NM_015338.6    | 167.00          | 98.78             | 98.71             | 98.42             | 96.97             |
| <i>ATRX</i>                  | NM_000489.5    | 99.00           | 100.00            | 99.76             | 98.36             | 91.13             |
| <i>BCOR</i>                  | NM_001123385.2 | 98.00           | 99.97             | 99.70             | 98.65             | 94.11             |
| <i>BCORL1</i>                | NM_001184772.2 | 76.00           | 99.81             | 98.14             | 92.41             | 81.99             |
| <i>BRAF</i>                  | NM_004333.6    | 105.00          | 99.99             | 99.70             | 99.25             | 95.30             |
| <i>BRCA1</i>                 | NM_007294.4    | 275.00          | 100.00            | 100.00            | 100.00            | 99.90             |
| <i>BRCA2</i>                 | NM_000059.3    | 191.00          | 100.00            | 100.00            | 99.99             | 99.76             |
| <i>BRIP1</i>                 | NM_032043.3    | 135.00          | 100.00            | 100.00            | 100.00            | 99.86             |
| <i>C15orf41</i>              | NM_001321759.2 | 110.00          | 100.00            | 100.00            | 100.00            | 99.52             |
| <i>CALR</i>                  | NM_004343.3    | 91.00           | 100.00            | 98.41             | 94.67             | 87.37             |
| <i>CBL</i>                   | NM_005188.4    | 121.00          | 100.00            | 100.00            | 99.98             | 99.80             |
| <i>CBLB</i>                  | NM_170662.5    | 117.00          | 99.78             | 99.27             | 98.32             | 95.48             |
| <i>CDAN1</i>                 | NM_138477.4    | 77.00           | 100.00            | 99.11             | 94.46             | 80.10             |
| <i>CDC42</i>                 | NM_001791.4    | 239.00          | 100.00            | 100.00            | 100.00            | 100.00            |
| <i>CDKN2A</i>                | NM_000077.4    | 170.00          | 100.00            | 99.50             | 97.48             | 92.36             |
| <i>CEBPA</i>                 | NM_004364.4    | 75.00           | 88.28             | 69.96             | 63.82             | 61.51             |
| <i>CECR1/ADA2</i>            | NM_001282225   | 125.00          | 100.00            | 100.00            | 99.99             | 99.93             |
| <i>CSF3R</i>                 | NM_156039.3    | 75.00           | 99.67             | 97.21             | 93.58             | 85.38             |
| <i>CTC1</i>                  | NM_025099.6    | 107.00          | 100.00            | 99.95             | 98.70             | 93.26             |
| <i>CTLA4</i>                 | NM_005214.5    | 133.00          | 100.00            | 100.00            | 100.00            | 98.97             |
| <i>CUX1</i>                  | NM_181552.4    | 82.00           | 98.16             | 95.51             | 91.62             | 85.53             |
| <i>CXCR4</i>                 | NM_003467.3    | 172.00          | 100.00            | 100.00            | 100.00            | 99.21             |
| <i>CYCS</i>                  | NM_018947.6    | 246.00          | 100.00            | 100.00            | 100.00            | 100.00            |
| <i>DKC1</i>                  | NM_001363.5    | 76.00           | 99.70             | 97.99             | 94.81             | 86.99             |
| <i>DNAJC21</i>               | NM_001012339.3 | 80.00           | 99.99             | 99.57             | 97.95             | 88.57             |
| <i>DNMT3A</i>                | NM_022552.4    | 82.00           | 99.86             | 97.74             | 91.61             | 81.41             |
| <i>DTNBP1</i>                | NM_032122.4    | 88.00           | 100.00            | 99.97             | 99.65             | 92.80             |
| <i>ELANE</i>                 | NM_001972.4    | 73.00           | 100.00            | 100.00            | 99.83             | 93.64             |
| <i>ENG</i>                   | NM_001114753.2 | 70.00           | 99.84             | 98.42             | 94.65             | 83.14             |
| <i>EPG5</i>                  | NM_020964.3    | 109.00          | 100.00            | 99.81             | 98.80             | 95.03             |
| <i>EPO</i>                   | NM_000799.4    | 80.00           | 100.00            | 99.17             | 90.78             | 72.64             |
| <i>ERCC4</i>                 | NM_005236.3    | 123.00          | 100.00            | 99.99             | 99.47             | 94.70             |
| <i>ERCC6L2</i>               | NM_020207.5    | 128.00          | 100.00            | 99.99             | 99.90             | 98.74             |
| <i>ETV6</i>                  | NM_001987.5    | 113.00          | 100.00            | 100.00            | 99.94             | 98.69             |
| <i>EZH2</i>                  | NM_004456.5    | 100.00          | 100.00            | 99.95             | 99.50             | 98.61             |
| <i>FANCA</i>                 | NM_000135.4    | 88.00           | 100.00            | 99.40             | 96.04             | 82.95             |

| <b>HGNC approved<br/>gene symbol</b> | <b>transcript</b> | <b>median<br/>depth</b> | <b>% covered<br/>&gt;10x</b> | <b>% covered<br/>&gt;20x</b> | <b>% covered<br/>&gt;30x</b> | <b>% covered<br/>&gt;50x</b> |
|--------------------------------------|-------------------|-------------------------|------------------------------|------------------------------|------------------------------|------------------------------|
| <i>FANCB</i>                         | NM_001018113.3    | 111.00                  | 100.00                       | 99.84                        | 97.74                        | 94.77                        |
| <i>FANCC</i>                         | NM_000136.3       | 91.00                   | 100.00                       | 100.00                       | 99.61                        | 93.15                        |
| <i>FANCD2</i>                        | NM_001018115.2    | 110.00                  | 100.00                       | 100.00                       | 99.96                        | 99.63                        |
| <i>FANCE</i>                         | NM_021922.3       | 87.00                   | 95.36                        | 89.17                        | 86.16                        | 80.81                        |
| <i>FANCF</i>                         | NM_022725.4       | 206.00                  | 100.00                       | 100.00                       | 99.86                        | 98.80                        |
| <i>FANCG</i>                         | NM_004629.1       | 106.00                  | 100.00                       | 99.71                        | 97.91                        | 91.91                        |
| <i>FANCI</i>                         | NM_001113378.1    | 117.00                  | 100.00                       | 100.00                       | 99.99                        | 99.61                        |
| <i>FANCL</i>                         | NM_018062.3       | 91.00                   | 100.00                       | 100.00                       | 99.95                        | 92.89                        |
| <i>FANCM</i>                         | NM_020937.4       | 138.00                  | 100.00                       | 99.87                        | 99.11                        | 96.06                        |
| <i>FERMT3</i>                        | NM_178443.2       | 82.00                   | 99.49                        | 95.87                        | 92.05                        | 81.85                        |
| <i>FLI1</i>                          | NM_002017.5       | 115.00                  | 100.00                       | 99.89                        | 99.53                        | 97.78                        |
| <i>FLT3</i>                          | NM_004119.3       | 112.00                  | 100.00                       | 99.49                        | 98.67                        | 98.06                        |
| <i>G6PC3</i>                         | NM_138387.3       | 83.00                   | 99.75                        | 94.51                        | 85.88                        | 79.06                        |
| <i>GATA1</i>                         | NM_002049.4       | 57.00                   | 99.23                        | 93.53                        | 86.02                        | 67.31                        |
| <i>GATA2</i>                         | NM_032638.5       | 74.00                   | 100.00                       | 98.80                        | 92.96                        | 74.13                        |
| <i>GFI1</i>                          | NM_005263.5       | 69.00                   | 100.00                       | 99.65                        | 98.03                        | 88.08                        |
| <i>GFI1B</i>                         | NM_004188.7       | 106.00                  | 100.00                       | 100.00                       | 100.00                       | 100.00                       |
| <i>GLRX5</i>                         | NM_016417.3       | 33.00                   | 81.54                        | 65.97                        | 53.73                        | 38.54                        |
| <i>GNAS</i>                          | NM_080425.3       | 169.00                  | 100.00                       | 99.92                        | 99.53                        | 96.20                        |
| <i>GRHL2</i>                         | NM_024915.4       | 103.00                  | 100.00                       | 99.87                        | 99.02                        | 93.15                        |
| <i>HAX1</i>                          | NM_006118.4       | 109.00                  | 100.00                       | 100.00                       | 99.99                        | 96.77                        |
| <i>HOXA11</i>                        | NM_005523.6       | 100.00                  | 100.00                       | 99.41                        | 94.74                        | 80.77                        |
| <i>IDH1</i>                          | NM_005896.3       | 121.00                  | 100.00                       | 100.00                       | 100.00                       | 100.00                       |
| <i>IDH2</i>                          | NM_002168.3       | 119.00                  | 98.97                        | 94.44                        | 91.84                        | 91.21                        |
| <i>IKZF1</i>                         | NM_006060.6       | 135.00                  | 100.00                       | 99.82                        | 98.86                        | 97.74                        |
| <i>JAK2</i>                          | NM_004972.3       | 107.00                  | 99.99                        | 99.91                        | 99.37                        | 97.86                        |
| <i>JAK3</i>                          | NM_000215.3       | 91.00                   | 99.97                        | 99.32                        | 97.45                        | 91.76                        |
| <i>KDM6A</i>                         | NM_001291415.1    | 93.00                   | 100.00                       | 99.60                        | 97.93                        | 88.13                        |
| <i>KIF23</i>                         | NM_138555.4       | 109.00                  | 100.00                       | 99.97                        | 99.31                        | 94.44                        |
| <i>KIT</i>                           | NM_000222.2       | 113.00                  | 100.00                       | 100.00                       | 100.00                       | 99.91                        |
| <i>KLF1</i>                          | NM_006563.5       | 77.00                   | 99.93                        | 98.37                        | 92.07                        | 84.38                        |
| <i>KMT2A</i>                         | NM_001197104.1    | 159.00                  | 99.73                        | 99.18                        | 98.38                        | 96.31                        |
| <i>KRAS</i>                          | NM_004985.5       | 120.00                  | 100.00                       | 99.32                        | 98.31                        | 88.38                        |
| <i>LIG4</i>                          | NM_002312.3       | 286.00                  | 100.00                       | 100.00                       | 100.00                       | 100.00                       |
| <i>LPIN2</i>                         | NM_014646.2       | 106.00                  | 100.00                       | 99.99                        | 99.87                        | 99.17                        |
| <i>LYST</i>                          | NM_000081.4       | 130.00                  | 100.00                       | 99.98                        | 99.80                        | 98.24                        |
| <i>MAD2L2</i>                        | NM_006341.4       | 87.00                   | 100.00                       | 100.00                       | 98.26                        | 79.72                        |
| <i>MECOM</i>                         | NM_004991.4       | 158.00                  | 100.00                       | 99.95                        | 99.34                        | 95.32                        |
| <i>MLPH</i>                          | NM_024101.7       | 79.00                   | 99.38                        | 93.33                        | 90.32                        | 84.76                        |
| <i>MPIG6B</i>                        | NM_025260         | 77.00                   | 99.28                        | 93.06                        | 87.40                        | 84.12                        |
| <i>MPL</i>                           | NM_005373.3       | 100.00                  | 100.00                       | 99.99                        | 99.91                        | 97.99                        |
| <i>MYD88</i>                         | NM_001172567.2    | 102.00                  | 100.00                       | 100.00                       | 99.74                        | 92.16                        |
| <i>MYH9</i>                          | NM_002473.5       | 82.00                   | 99.88                        | 97.73                        | 91.58                        | 77.76                        |
| <i>MYSM1</i>                         | NM_001085487.3    | 131.00                  | 99.93                        | 98.75                        | 96.25                        | 93.05                        |
| <i>NHP2</i>                          | NM_017838.3       | 101.00                  | 100.00                       | 100.00                       | 100.00                       | 99.83                        |
| <i>NOP10</i>                         | NM_018648.3       | 103.00                  | 100.00                       | 100.00                       | 100.00                       | 100.00                       |
| <i>NOTCH1</i>                        | NM_017617.5       | 96.00                   | 98.99                        | 97.62                        | 94.26                        | 85.40                        |

| <b>HGNC approved<br/>gene symbol</b> | <b>transcript</b> | <b>median<br/>depth</b> | <b>% covered<br/>&gt;10x</b> | <b>% covered<br/>&gt;20x</b> | <b>% covered<br/>&gt;30x</b> | <b>% covered<br/>&gt;50x</b> |
|--------------------------------------|-------------------|-------------------------|------------------------------|------------------------------|------------------------------|------------------------------|
| <i>NPM1</i>                          | NM_002520.6       | 141.00                  | 94.61                        | 93.42                        | 93.23                        | 90.43                        |
| <i>NRAS</i>                          | NM_002524.5       | 132.00                  | 100.00                       | 100.00                       | 100.00                       | 99.96                        |
| <i>PALB2</i>                         | NM_024675.4       | 239.00                  | 100.00                       | 100.00                       | 99.94                        | 99.29                        |
| <i>PARN</i>                          | NM_002582.4       | 101.00                  | 100.00                       | 100.00                       | 99.92                        | 97.88                        |
| <i>PDGFRA</i>                        | NM_006206.6       | 114.00                  | 100.00                       | 100.00                       | 99.99                        | 99.83                        |
| <i>PHF6</i>                          | NM_001015877.2    | 59.00                   | 99.99                        | 98.08                        | 89.74                        | 63.33                        |
| <i>PIEZO1</i>                        | NM_001142864.4    | 89.00                   | 99.90                        | 98.50                        | 93.66                        | 80.76                        |
| <i>PRKACG</i>                        | NM_002732.3       | 174.00                  | 100.00                       | 100.00                       | 100.00                       | 100.00                       |
| <i>PTEN</i>                          | NM_000314.8       | 152.00                  | 100.00                       | 100.00                       | 100.00                       | 99.55                        |
| <i>PTPN11</i>                        | NM_002834.4       | 137.00                  | 99.19                        | 99.17                        | 99.17                        | 99.17                        |
| <i>PUS1</i>                          | NM_025215.6       | 98.00                   | 100.00                       | 99.76                        | 97.98                        | 93.40                        |
| <i>RAB27A</i>                        | NM_183235.3       | 120.00                  | 100.00                       | 100.00                       | 100.00                       | 99.59                        |
| <i>RAD21</i>                         | NM_006265.3       | 100.00                  | 100.00                       | 100.00                       | 99.92                        | 98.46                        |
| <i>RAD51</i>                         | NM_002875.5       | 98.00                   | 100.00                       | 100.00                       | 100.00                       | 100.00                       |
| <i>RAD51C</i>                        | NM_058216.3       | 116.00                  | 100.00                       | 100.00                       | 99.92                        | 98.06                        |
| <i>RASGRP2</i>                       | NM_001098671.2    | 91.00                   | 100.00                       | 99.62                        | 96.87                        | 83.68                        |
| <i>RBM8A</i>                         | NM_005105.4       | 102.00                  | 100.00                       | 100.00                       | 99.84                        | 99.08                        |
| <i>RGS2</i>                          | NM_002923.4       | 91.00                   | 100.00                       | 100.00                       | 99.84                        | 98.84                        |
| <i>RMRP</i>                          | NR_003051         | 0.00                    | 0.00                         | 0.00                         | 0.00                         | 0.00                         |
| <i>RPL11</i>                         | NM_000975.5       | 103.00                  | 100.00                       | 100.00                       | 100.00                       | 96.50                        |
| <i>RPL15</i>                         | NM_001253383.3    | 101.00                  | 99.89                        | 98.96                        | 95.97                        | 93.10                        |
| <i>RPL17</i>                         | NM_001199343.2    | 149.00                  | 100.00                       | 100.00                       | 100.00                       | 99.73                        |
| <i>RPL18</i>                         | NM_000979.4       | 92.00                   | 100.00                       | 100.00                       | 99.58                        | 96.96                        |
| <i>RPL26</i>                         | NM_000987.5       | 113.00                  | 100.00                       | 100.00                       | 100.00                       | 100.00                       |
| <i>RPL27</i>                         | NM_000988.5       | 171.00                  | 100.00                       | 100.00                       | 100.00                       | 99.79                        |
| <i>RPL31</i>                         | NM_000993.5       | 151.00                  | 100.00                       | 100.00                       | 100.00                       | 100.00                       |
| <i>RPL35A</i>                        | NM_000996.4       | 170.00                  | 99.88                        | 97.95                        | 93.28                        | 92.58                        |
| <i>RPL36</i>                         | NM_033643.3       | 75.00                   | 99.87                        | 95.34                        | 85.89                        | 71.59                        |
| <i>RPL5</i>                          | NM_000969.5       | 115.00                  | 99.76                        | 97.47                        | 94.63                        | 91.69                        |
| <i>RPL9</i>                          | NM_001024921.3    | 122.00                  | 100.00                       | 100.00                       | 100.00                       | 99.56                        |
| <i>RPS10</i>                         | NM_001014.5       | 129.00                  | 100.00                       | 100.00                       | 99.97                        | 99.49                        |
| <i>RPS14</i>                         | NM_005617.4       | 136.00                  | 100.00                       | 100.00                       | 100.00                       | 100.00                       |
| <i>RPS15</i>                         | NM_001018.4       | 162.00                  | 84.04                        | 80.32                        | 80.32                        | 80.26                        |
| <i>RPS15A</i>                        | NM_001019.5       | 101.00                  | 100.00                       | 100.00                       | 100.00                       | 99.96                        |
| <i>RPS17</i>                         | NM_001021.6       | 0.00                    | 0.00                         | 0.00                         | 0.00                         | 0.00                         |
| <i>RPS19</i>                         | NM_001022.4       | 84.00                   | 100.00                       | 100.00                       | 99.57                        | 97.74                        |
| <i>RPS24</i>                         | NM_033022.4       | 218.00                  | 100.00                       | 100.00                       | 100.00                       | 100.00                       |
| <i>RPS26</i>                         | NM_001029.5       | 98.00                   | 100.00                       | 100.00                       | 100.00                       | 99.93                        |
| <i>RPS27</i>                         | NM_001030.6       | 110.00                  | 100.00                       | 100.00                       | 99.69                        | 97.33                        |
| <i>RPS27A</i>                        | NM_001177413.1    | 147.00                  | 100.00                       | 100.00                       | 100.00                       | 99.36                        |
| <i>RPS28</i>                         | NM_001031.5       | 33.00                   | 99.93                        | 89.83                        | 59.83                        | 26.50                        |
| <i>RPS29</i>                         | NM_001032.4       | 177.00                  | 100.00                       | 100.00                       | 100.00                       | 100.00                       |
| <i>RPS7</i>                          | NM_001011.4       | 153.00                  | 92.30                        | 87.48                        | 85.87                        | 81.52                        |
| <i>RPS8</i>                          | NM_001012.2       | 105.00                  | 100.00                       | 100.00                       | 100.00                       | 99.33                        |
| <i>RTKL1</i>                         | NM_001283009.2    | 90.00                   | 100.00                       | 99.89                        | 98.36                        | 86.89                        |
| <i>RTL1</i>                          | NM_001134888.2    | 180.00                  | 100.00                       | 99.94                        | 99.60                        | 98.43                        |
| <i>RUNX1</i>                         | NM_001754.4       | 62.00                   | 99.92                        | 97.26                        | 86.93                        | 67.08                        |

| <b>HGNC approved<br/>gene symbol</b> | <b>transcript</b> | <b>median<br/>depth</b> | <b>% covered<br/>&gt;10x</b> | <b>% covered<br/>&gt;20x</b> | <b>% covered<br/>&gt;30x</b> | <b>% covered<br/>&gt;50x</b> |
|--------------------------------------|-------------------|-------------------------|------------------------------|------------------------------|------------------------------|------------------------------|
| <i>SAMD9</i>                         | NM_017654.4       | 305.00                  | 100.00                       | 100.00                       | 100.00                       | 100.00                       |
| <i>SAMD9L</i>                        | NM_152703.5       | 314.00                  | 100.00                       | 100.00                       | 100.00                       | 100.00                       |
| <i>SBDS</i>                          | NM_016038.4       | 131.00                  | 100.00                       | 100.00                       | 100.00                       | 100.00                       |
| <i>SEC23B</i>                        | NM_006363.6       | 114.00                  | 100.00                       | 99.88                        | 98.62                        | 95.62                        |
| <i>SETBP1</i>                        | NM_015559.3       | 149.00                  | 99.37                        | 98.06                        | 96.13                        | 92.51                        |
| <i>SF3B1</i>                         | NM_012433.3       | 116.00                  | 99.89                        | 98.67                        | 96.62                        | 93.73                        |
| <i>SLC25A38</i>                      | NM_017875.4       | 157.00                  | 100.00                       | 100.00                       | 100.00                       | 99.53                        |
| <i>SLC37A4</i>                       | NM_001164277.1    | 99.00                   | 100.00                       | 99.72                        | 98.33                        | 94.76                        |
| <i>SLX4</i>                          | NM_032444.4       | 108.00                  | 99.95                        | 99.40                        | 97.80                        | 93.27                        |
| <i>SMC1A</i>                         | NM_006306.4       | 90.00                   | 99.96                        | 99.41                        | 98.06                        | 92.98                        |
| <i>SMC3</i>                          | NM_005445.3       | 90.00                   | 99.96                        | 99.33                        | 96.55                        | 89.06                        |
| <i>SRP72</i>                         | NM_006947.4       | 112.00                  | 100.00                       | 100.00                       | 100.00                       | 99.89                        |
| <i>SRSF2</i>                         | NM_001195427.2    | 195.00                  | 100.00                       | 100.00                       | 100.00                       | 100.00                       |
| <i>STAG2</i>                         | NM_001042750.2    | 74.00                   | 99.83                        | 98.63                        | 95.78                        | 84.54                        |
| <i>STEAP3</i>                        | NM_182915.3       | 105.00                  | 99.91                        | 98.04                        | 95.30                        | 88.53                        |
| <i>STIM1</i>                         | NM_003156.3       | 108.00                  | 100.00                       | 99.98                        | 99.61                        | 96.79                        |
| <i>STK4</i>                          | NM_006282.5       | 107.00                  | 99.61                        | 98.36                        | 96.88                        | 91.64                        |
| <i>TAZ</i>                           | NM_000116.5       | 59.00                   | 99.42                        | 96.11                        | 88.35                        | 67.89                        |
| <i>TERC</i>                          | NR_001566         | 0.00                    | 0.00                         | 0.00                         | 0.00                         | 0.00                         |
| <i>TERT</i>                          | NM_198253.3       | 84.00                   | 99.76                        | 97.73                        | 95.01                        | 87.45                        |
| <i>TET2</i>                          | NM_001127208.2    | 214.00                  | 100.00                       | 99.97                        | 99.60                        | 98.45                        |
| <i>THPO</i>                          | NM_000460.4       | 163.00                  | 100.00                       | 99.87                        | 99.02                        | 95.94                        |
| <i>TINF2</i>                         | NM_001099274.3    | 157.00                  | 100.00                       | 100.00                       | 100.00                       | 99.93                        |
| <i>TP53</i>                          | NM_000546.5       | 130.00                  | 100.00                       | 100.00                       | 100.00                       | 100.00                       |
| <i>TSR2</i>                          | NM_058163.3       | 60.00                   | 99.92                        | 96.32                        | 85.84                        | 63.00                        |
| <i>U2AF1</i>                         | NM_006758.2       | 188.00                  | 100.00                       | 100.00                       | 100.00                       | 96.91                        |
| <i>UBE2T</i>                         | NM_014176.4       | 108.00                  | 100.00                       | 100.00                       | 100.00                       | 99.62                        |
| <i>USB1</i>                          | NM_024598.4       | 78.00                   | 99.35                        | 92.32                        | 81.86                        | 76.72                        |
| <i>WAS</i>                           | NM_000377.3       | 53.00                   | 99.58                        | 94.05                        | 81.44                        | 54.23                        |
| <i>WRAP53</i>                        | NM_018081.2       | 99.00                   | 100.00                       | 99.93                        | 99.30                        | 96.51                        |
| <i>WT1</i>                           | NM_024426.6       | 70.00                   | 99.88                        | 98.27                        | 91.39                        | 74.72                        |
| <i>XRCC2</i>                         | NM_005431.2       | 226.00                  | 100.00                       | 100.00                       | 100.00                       | 100.00                       |
| <i>YARS2</i>                         | NM_001040436.3    | 139.00                  | 100.00                       | 100.00                       | 100.00                       | 100.00                       |
| <i>ZRSR2</i>                         | NM_005089.3       | 79.00                   | 94.19                        | 86.42                        | 78.72                        | 67.92                        |
